# Supplementary material for: Molecular dynamics of different polymer blends containing poly(2,6-dimethyl-1,4-phenylene ether)
Source: Royal Society of Chemistry journal article supplement (doi:10.1039/c4cp03392b), 2015-01-01
Supplement: c4cp03392b1.pdf [file c4cp03392b1.pdf]

## Supplementary Information

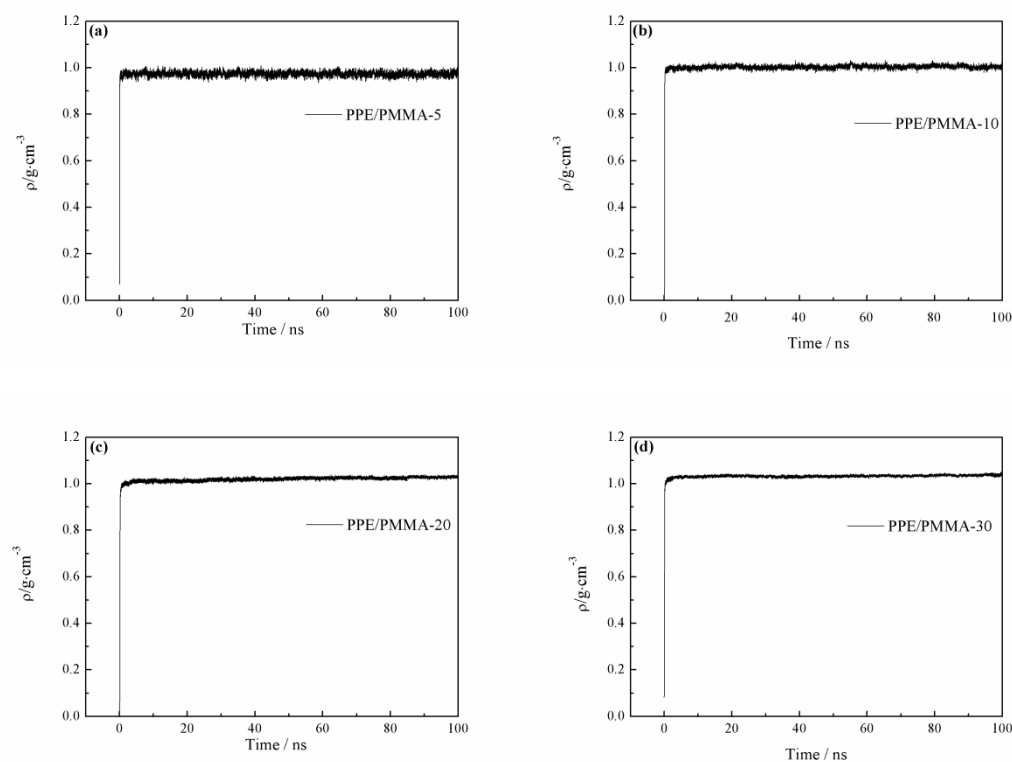

Figure S1: The densities of PPE/PMMA with different DPs during equilibration

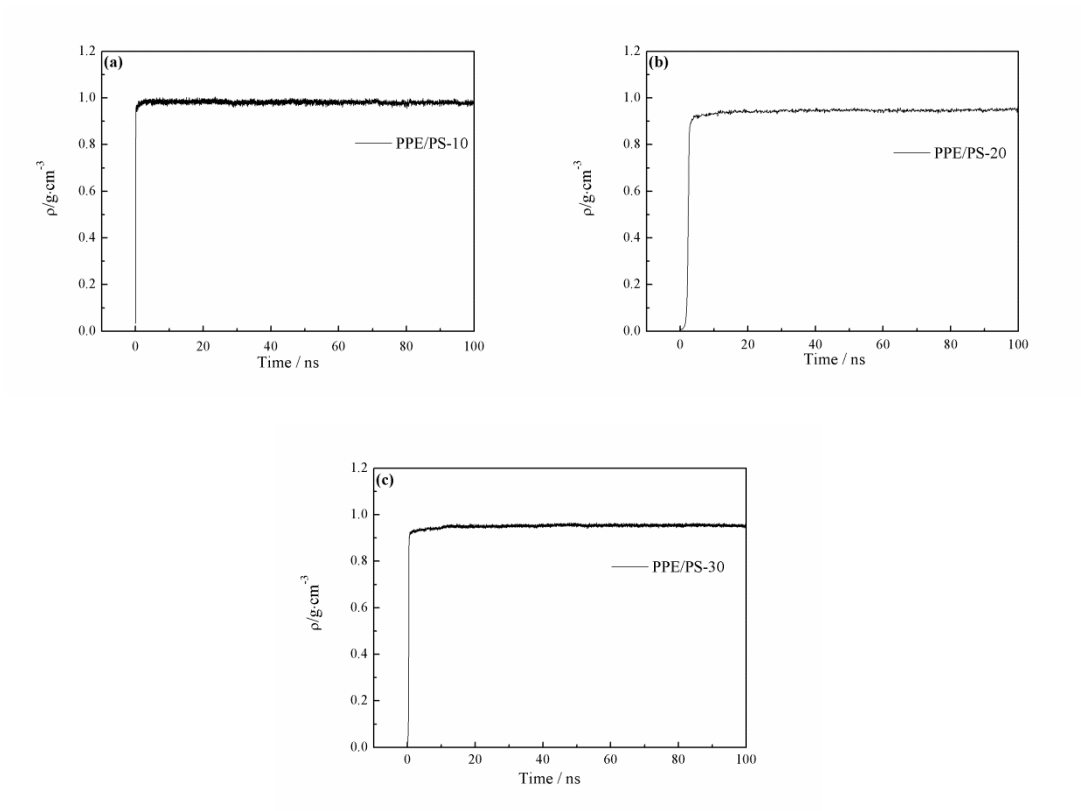

Figure S2: The densities of PPE/PS with different DPs during equilibration

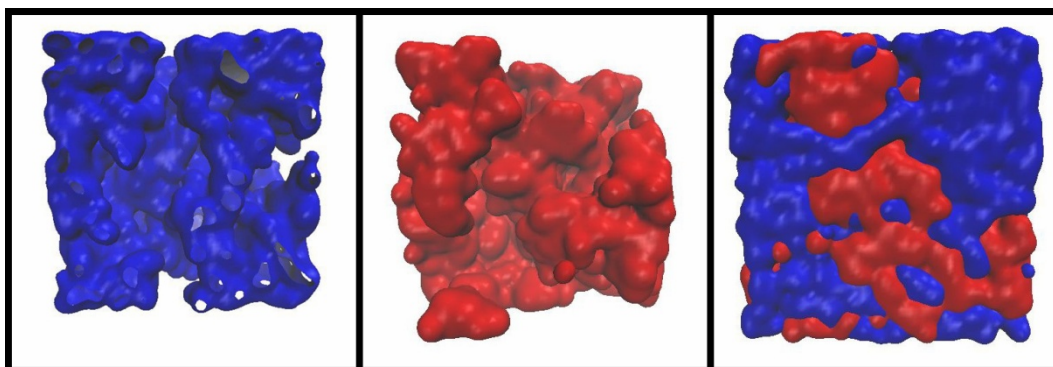

Figure S3: Snapshots of PPE/PMMA after 100ns equilibration (PPE=blue and PMMA=red)

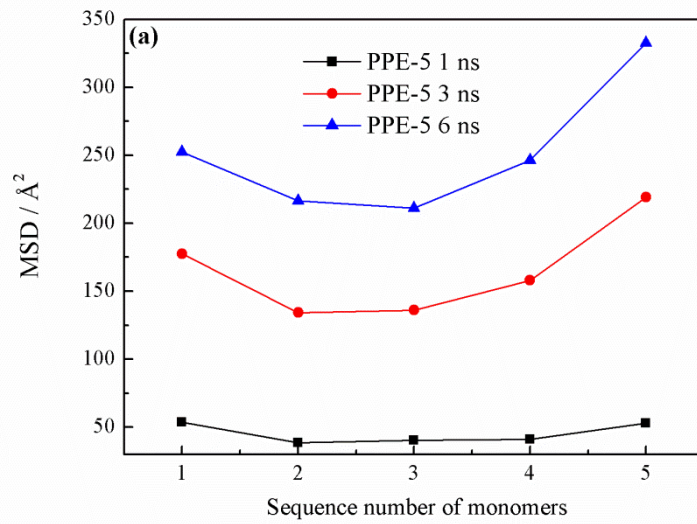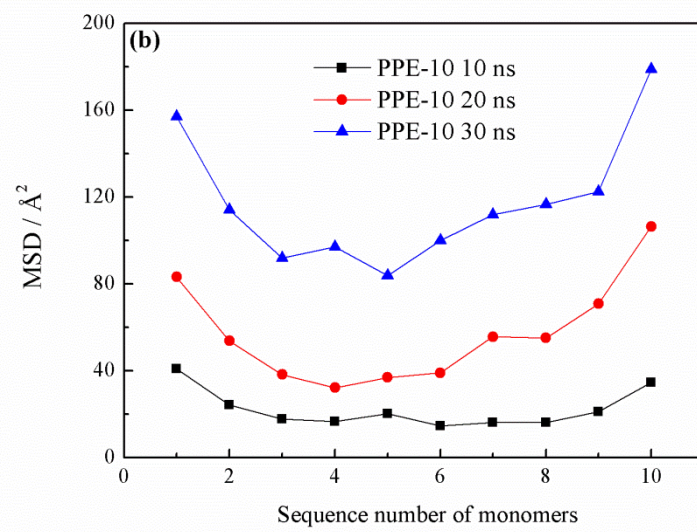

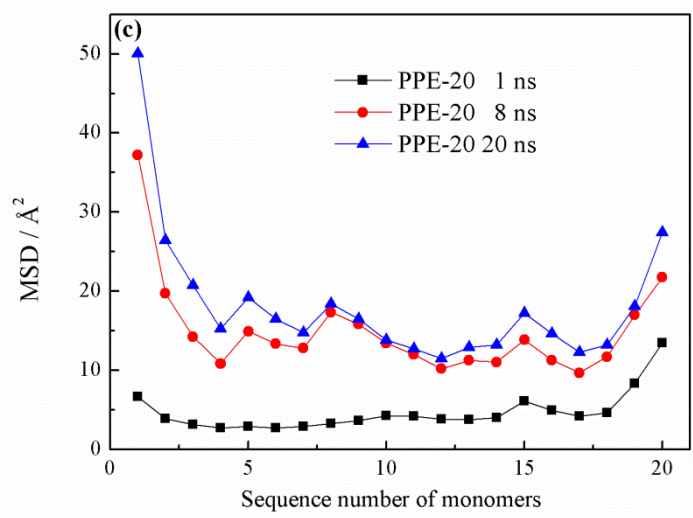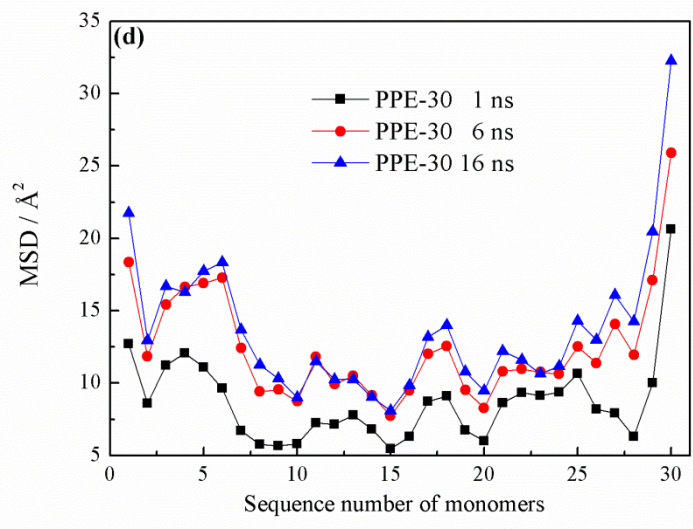

Figure S4: Mean squared displacements of all monomers along the polymer chains with different DP in pure PPE

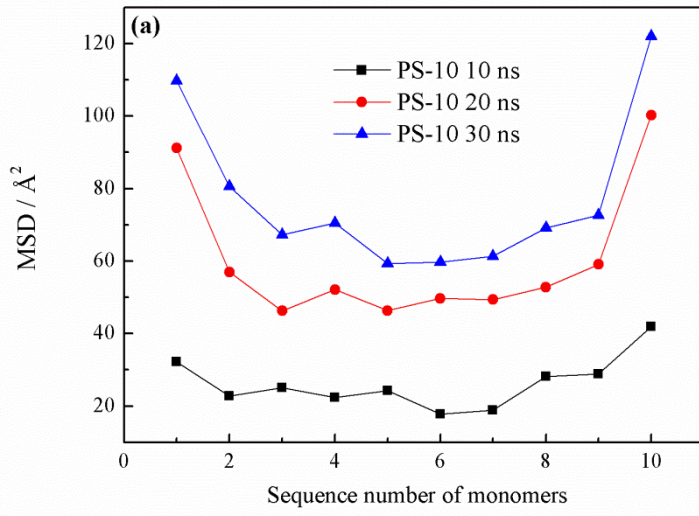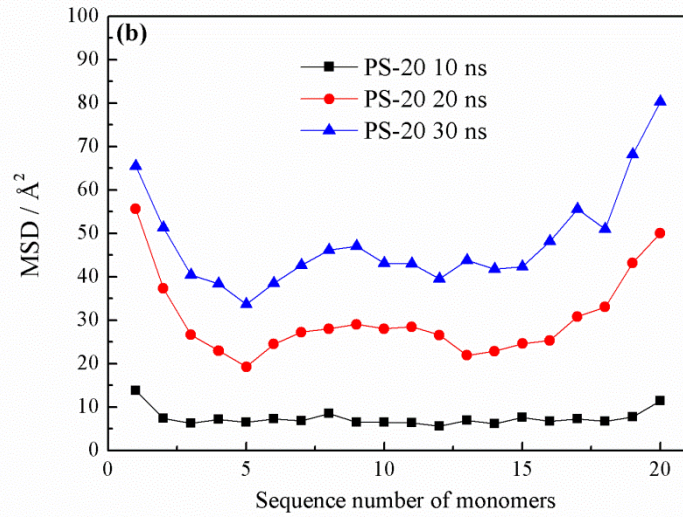

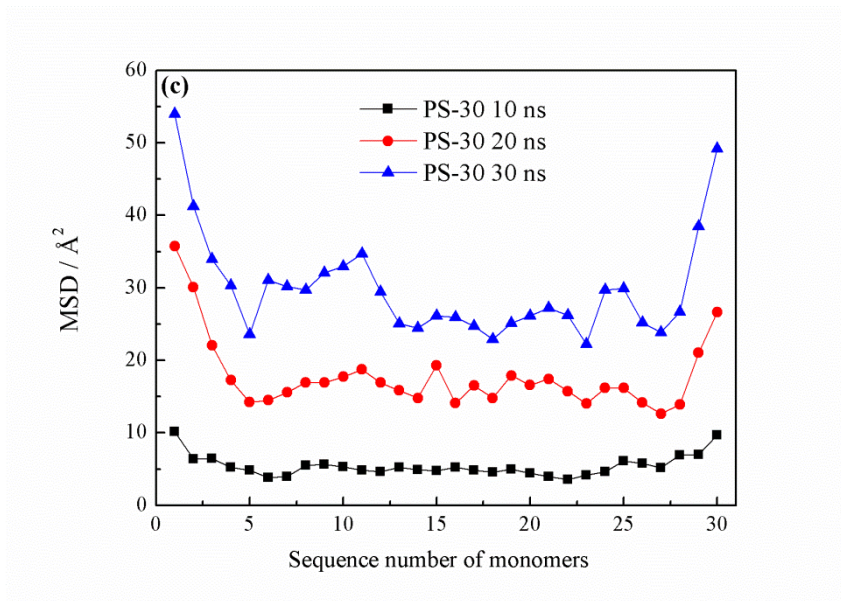

Figure S5: Mean squared displacements of all monomers along the polymer chains with different DP in pure PS

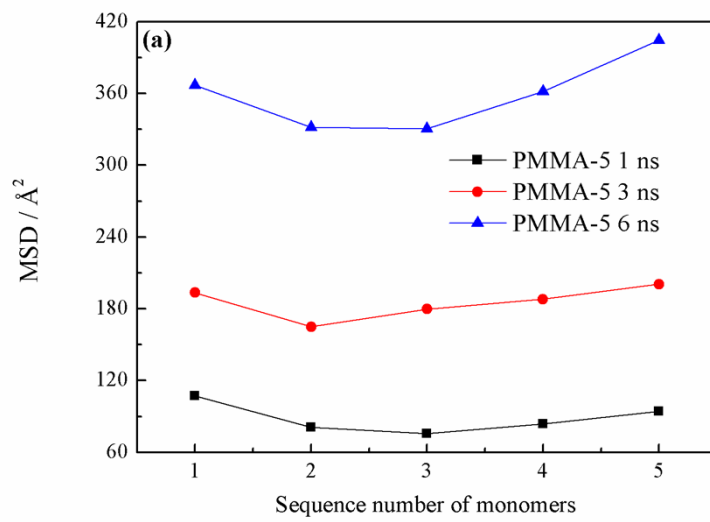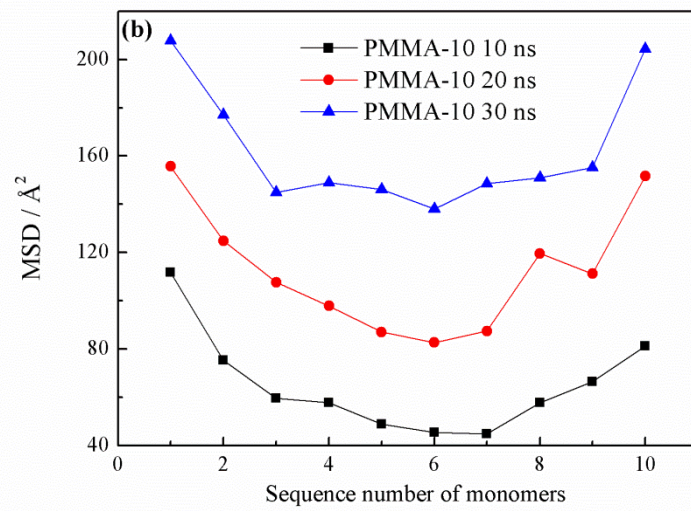



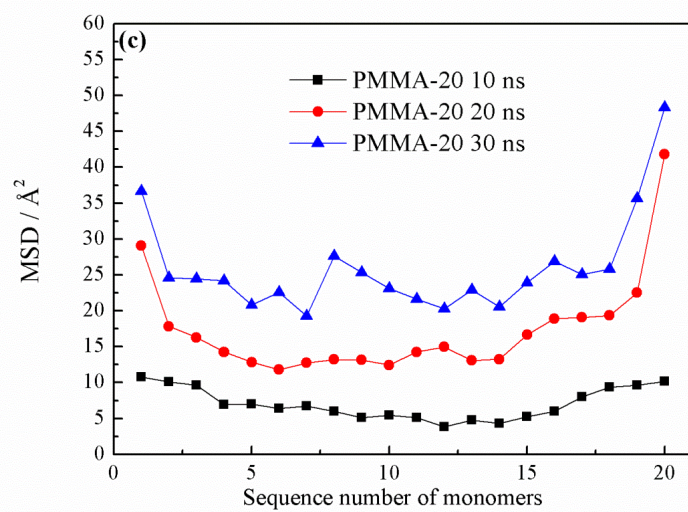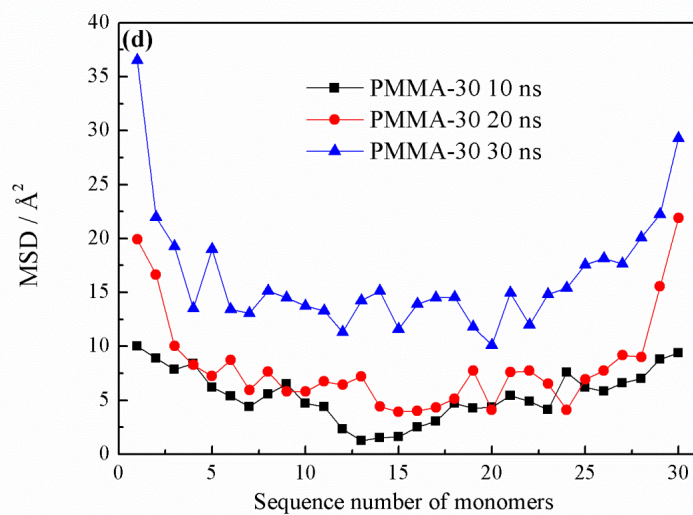

Fig S6: Mean squared displacements of all monomers along the polymer chains with different DP in pure PMMA

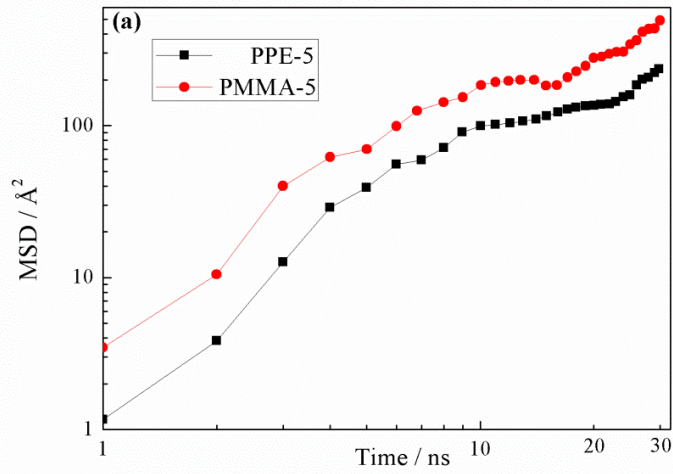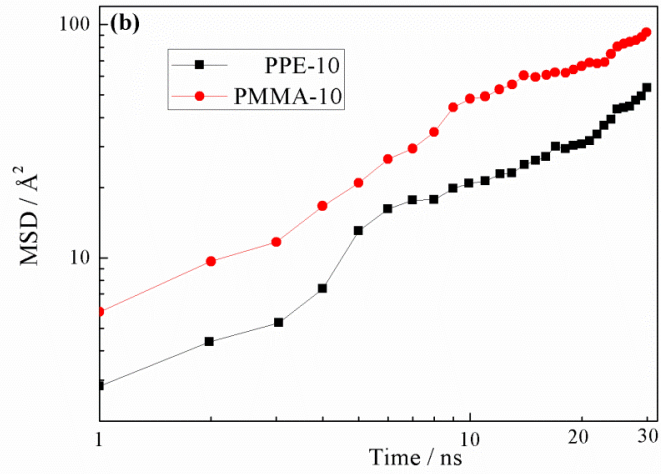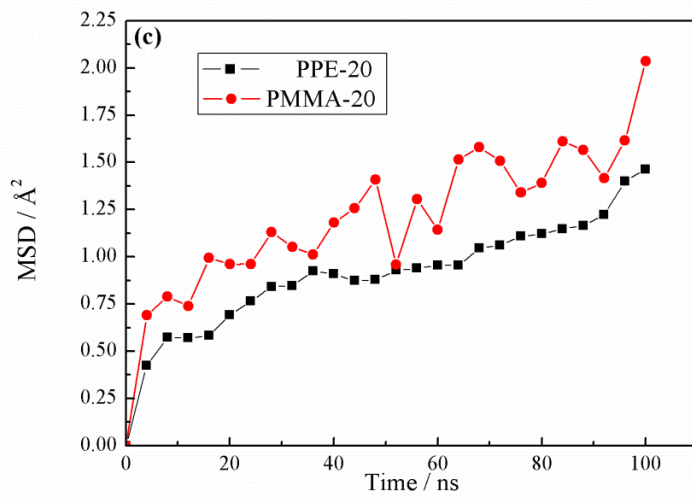

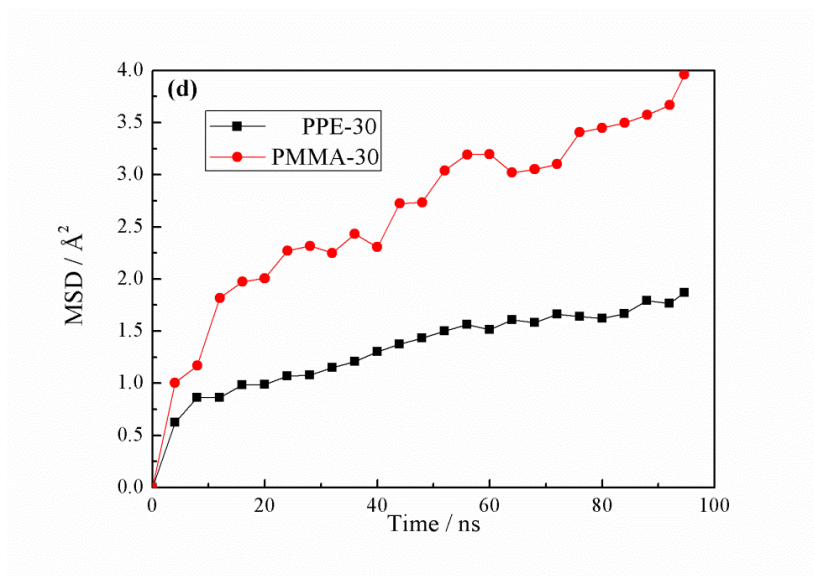

Fig S7: Mean squared displacements of the central monomers of PPE and PMMA with different polymerization degrees in PPE/PMMA

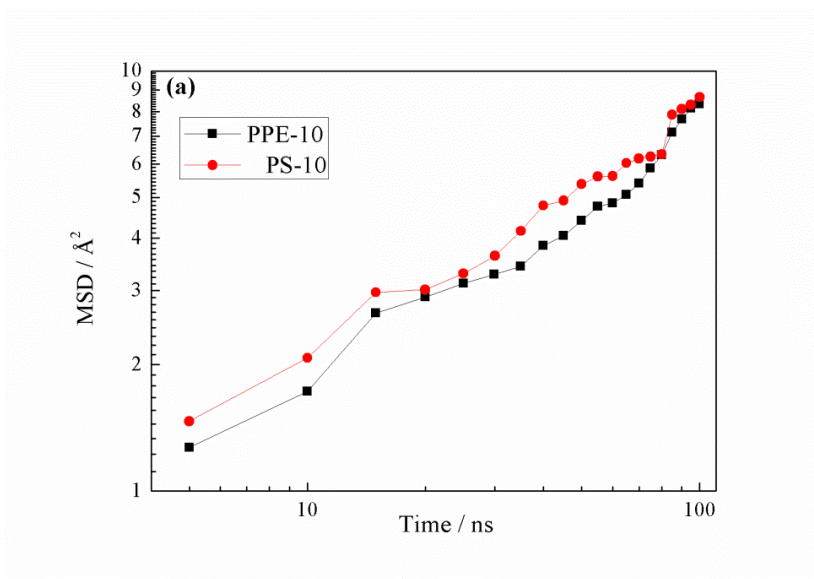

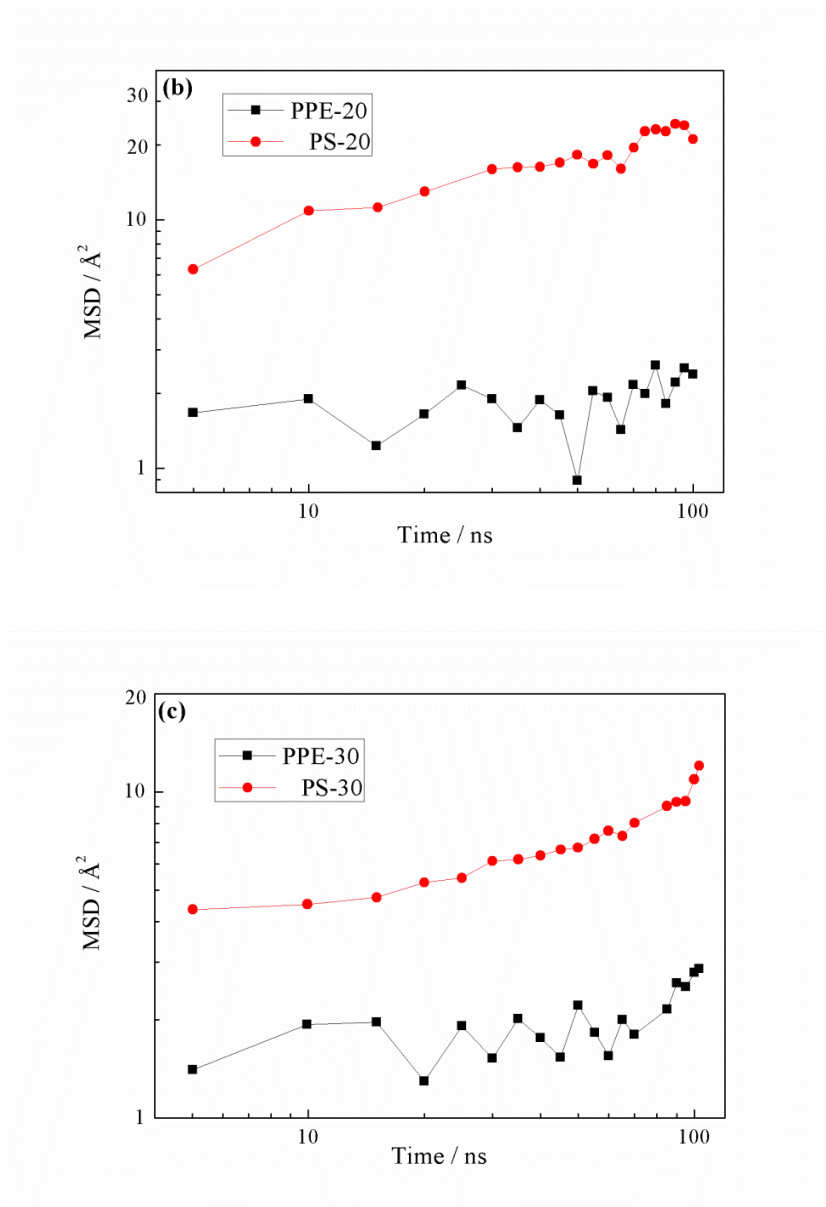

Fig S8: Mean squared displacements of the central monomers of PPE and PS with different polymerization degrees in PPE/PS

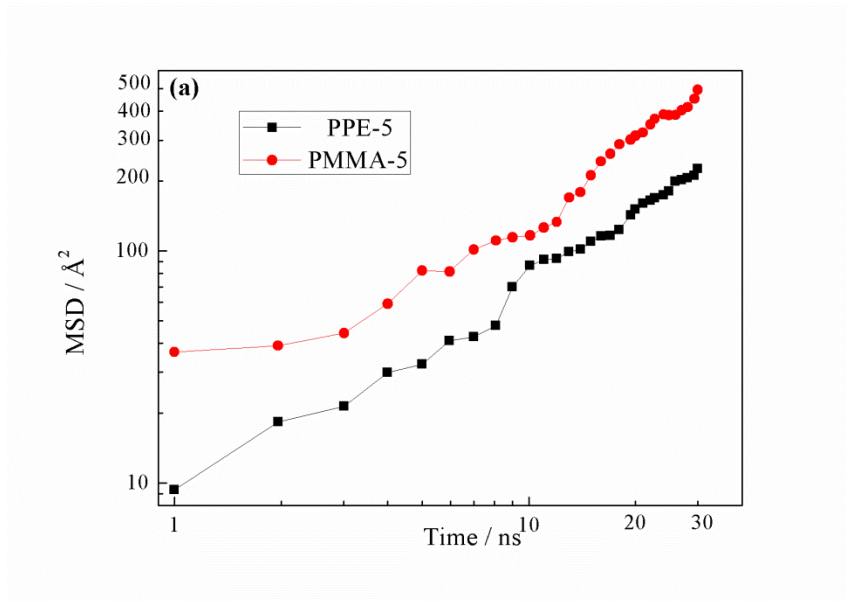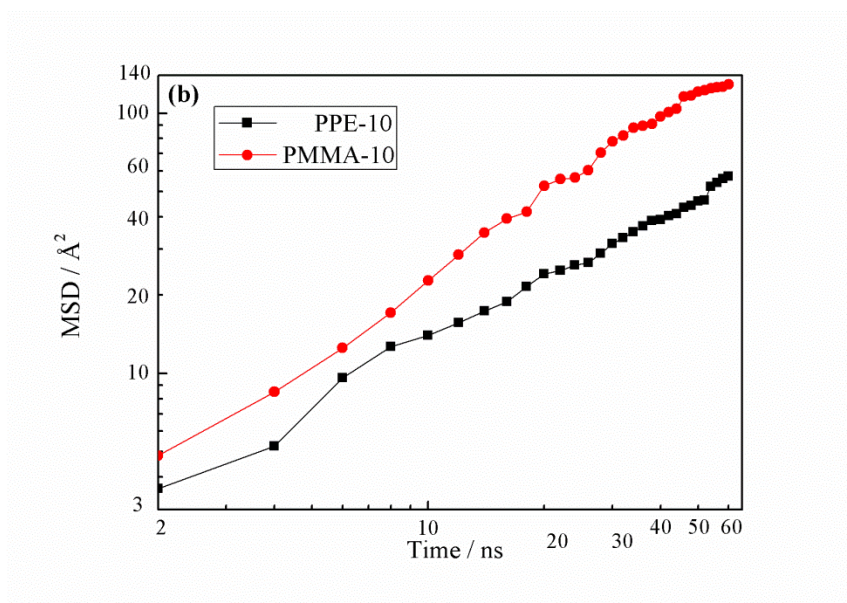

Fig S9: Molecular mean squared displacements of PPE and PMMA with polymerization degree=5 and 10 in PPE/PMMA

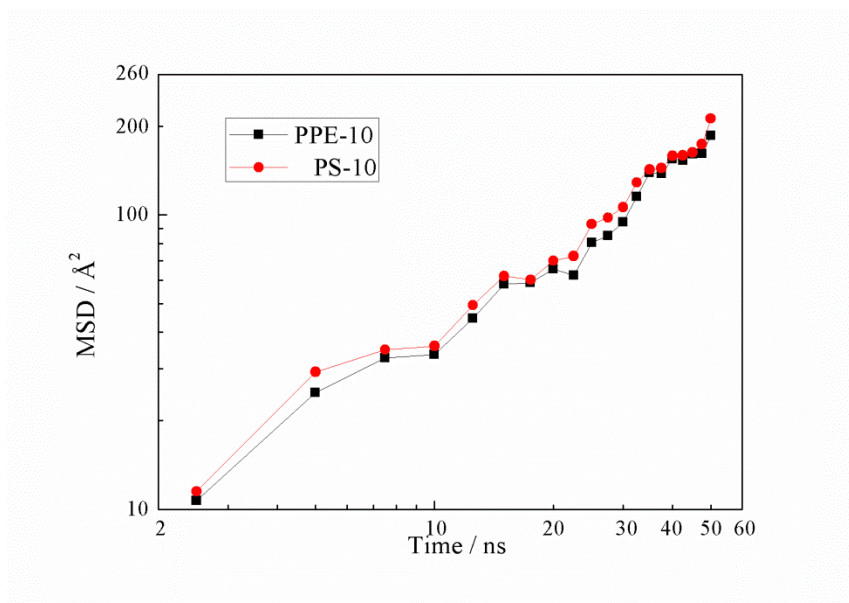

Fig S10: Molecular mean squared displacements of PPE and PS with polymerization

degree =10 in PPE/PS
